# Supplementary material for: Three-dimensional biofilm colony growth supports a mutualism involving matrix and nutrient sharing
Source: eLife. 2021 Feb 17;10:e64145. doi: 10.7554/eLife.64145 (PMC7925131; doi:10.7554/eLife.64145)
Supplement: Supplementary file 4. [file elife-64145-supp4.xlsx]

## Sheet: Sheet1
Supplementary File 4: Competitive fitness data of select gene knockdowns with media additives
	aroF			glyA			guaB			folK			gatA			trnH			folC			tilS			tagG			cysS			dapL			gpsA			dxr			mntA			hprT			mgtE			racE
	rep. 1	rep. 2	rep. 3	rep. 1	rep. 2	rep. 3	rep. 1	rep. 2	rep. 3	rep. 1	rep. 2	rep. 3	rep. 1	rep. 2	rep. 3	rep. 1	rep. 2	rep. 3	rep. 1	rep. 2	rep. 3	rep. 1	rep. 2	rep. 3	rep. 1	rep. 2	rep. 3	rep. 1	rep. 2	rep. 3	rep. 1	rep. 2	rep. 3	rep. 1	rep. 2	rep. 3	rep. 1	rep. 2	rep. 3	rep. 1	rep. 2	rep. 3	rep. 1	rep. 2	rep. 3	rep. 1	rep. 2	rep. 3	rep. 1
LB	1.03236	0.975533	0.803501	0.933124	0.715903	1.05406	0.933209	0.994447	0.399796	0.320722	0.76856	0.969546	0.866947	1.00273	0.697005	0.988966	0.969322	0.954671	0.315413	0.161294	0.861133	0.886081	0.918491	0.997638	0.731158	1.02876	0.91882	0.932909	0.338299	0.18734	0.451714	0.0831664	0.509555	0.870639	0.632423	0.86316	0.641903	0.367587	0.69511	0.502761	0.460102	0.112676	0.487523	0.809768	0.606825	0.885944	0.648165	0.319008	0.673151
LB xylose	0.720205	0.50365	0.338506	0.369463	0.220171	0.962269	0.445879	0.36838	0.0523068	0.0651083	0.492241	0.466802	0.365717	0.460665	0.037119	0.916752	0.30342	0.329906	0	0	0.591283	0.423117	0.415958	0.43244	0.21985	0.931641	0.313993	0.290487	0.00380818	0	0.050898	0	0.0221208	0.623011	0.261771	0.342389	0.205811	0.0259716	0.171021	0.0657936	0.0234	0	0.0719099	0.592959	0.251421	0.353445	0.0655988	0.010795	0.218173
MSgg	0.44942	0.708639	0.838248	0.884364	0.45693	1.08154	0.733409	1.02345	0.173352	0.0794865	0.331577	0.674409	0.846471	0.91875	0.351111	1.04921	0.660927	0.976745	0.0554633	0	0.393185	0.589911	0.874322	0.929855	0.5061	1.10006	0.648627	1.00418	0.177668	0.00103781	0.689093	0.401313	0.772787	1.14653	1.0157	1.04837	0.912504	0.788151	0.77635	0.910419	0.67667	0.405274	0.785058	1.16141	1.02383	1.08386	0.924292	0.791831	0.878601
MSgg xylose	0	0	0.0447022	0.0711713	0.225908	0.639329	0.37716	0.199743	0.0848438	0.0779007	0	0	0	0.10135	0	0.480379	0	0.0125748	0	0	0	0	0.0570742	0.0266669	0.175056	0.505752	0.0659029	0.0371054	0	0	0	0.12892	0	1.04846	0.704283	0.75463	0.54187	0.596114	0.470774	0.814731	0	0.17481	0.215227	1.03544	0.711266	0.811581	0.551009	0.594918	0.508567
LB asp	0.975268	0.879731	0.770278	0.893321	0.640403	0.986195	0.916165	0.920873	0.394914	0.275746	0.740447	0.88374	0.79969	0.943984	0.593417	0.952817	0.956739	0.905716	0.317935	0.181631	0.87083	0.832883	0.828793	0.939352	0.669648	1.02966	0.925856	0.872794	0.326132	0.201189	0.423699	0.123604	0.475516	0.835618	0.544762	0.799821	0.526089	0.289177	0.673523	0.470512	0.407004	0.154653	0.45757	0.80881	0.530965	0.823454	0.494902	0.278752	0.683881
LB xylose asp	0.716851	0.500172	0.385711	0.391334	0.238169	0.916758	0.444839	0.369625	0.0841522	0.075216	0.591779	0.417797	0.366628	0.399995	0.0576499	0.853236	0.251277	0.289789	0	0	0.618686	0.381221	0.399198	0.384726	0.199866	0.888026	0.270145	0.261529	0.0249871	0	0.051904	0	0.0348541	0.554111	0.237023	0.275898	0.182515	0.0027896	0.187058	0.0611575	0.0244287	0	0.0924048	0.533141	0.239941	0.302723	0.0528915	0	0.221219
LB asn	0.944566	0.881288	0.757908	0.825707	0.675596	0.920119	0.848861	0.872309	0.384505	0.258329	0.771375	0.896647	0.820801	0.897775	0.660535	0.910068	0.878513	0.886318	0.338216	0.211954	0.831897	0.812388	0.822672	0.883951	0.677327	0.920307	0.850717	0.837325	0.336081	0.21426	0.434432	0.132506	0.518334	0.77148	0.595663	0.784624	0.603075	0.325173	0.749609	0.490839	0.420532	0.165839	0.491042	0.735788	0.576853	0.810874	0.569265	0.324174	0.702466
LB xylose asn	0.731959	0.528982	0.394318	0.412722	0.175934	0.896509	0.431346	0.367015	0	0	0.59882	0.456659	0.413424	0.433159	0	0.846146	0.248949	0.304294	0	0	0.62628	0.426808	0.449043	0.407161	0.143876	0.86521	0.269967	0.263873	0	0	0	0	0	0.559254	0.229383	0.296068	0.152295	0	0.10795	0	0	0	0.0445965	0.533627	0.225364	0.319058	0	0	0.156643
LB glu	1.00265	0.88627	0.763823	0.841936	0.666523	0.992644	0.875845	0.95656	0.413786	0.300503	0.739322	0.873077	0.80243	0.908573	0.640701	0.951189	0.889917	0.903283	0.319582	0.193008	0.858934	0.839359	0.833037	0.944452	0.638497	0.950274	0.861328	0.899613	0.333479	0.229953	0.49518	0.202459	0.478416	0.859585	0.585525	0.799019	0.577	0.325875	0.659848	0.536628	0.456922	0.180151	0.51392	0.816714	0.575044	0.821469	0.546286	0.341251	0.67645
LB xylose glu	0.584681	0.237915	0.251872	0.223924	0.224203	0.824381	0.356743	0.291555	0.123755	0.121107	0.393276	0.198621	0.233904	0.248505	0.0820315	0.792532	0.1318	0.201857	0.0172009	0.0205427	0.452784	0.175818	0.304294	0.22725	0.223844	0.815335	0.150131	0.192504	0.0806412	0.0402785	0.0822655	0.0321871	0.0637596	0.615161	0.155319	0.371634	0.157259	0.0547496	0.224939	0.0630436	0.0488997	0.0139464	0.119247	0.591187	0.15034	0.286804	0.0453875	0.0385187	0.21598
LB Mg++	0.987649	0.904645	0.753813	0.908311	0.643016	1.01549	0.890892	0.940889	0.342834	0.272298	0.726915	0.909619	0.806393	0.965827	0.599248	1.00205	0.945131	0.914447	0.278754	0.18029	0.866161	0.830406	0.825813	0.950835	0.64721	1.01981	0.879796	0.887984	0.275943	0.198867	0.445498	0.168588	0.411464	0.898244	0.560399	0.909263	0.569406	0.380534	0.671785	0.495438	0.433817	0.163012	0.440516	0.878811	0.523156	0.908666	0.513596	0.35318	0.70411
LB xylose Mg++	0.662153	0.44797	0.341701	0.342695	0.17444	0.882614	0.404585	0.305764	0	0	0.496431	0.424258	0.344316	0.38753	0	0.834333	0.207987	0.257253	0	0	0.536032	0.382587	0.388797	0.363576	0.174941	0.859633	0.246445	0.234288	0	0	0	0	0	0.573667	0.217241	0.566067	0.188502	0	0.146482	0.0332835	0	0	0.0442771	0.553469	0.204623	0.609509	0.064627	0	0.156019
LB Mn++	1.06243	1.03415	0.839294	0.990077	0.815862	1.04839	0.988319	0.960969	0.511705	0.434004	0.910141	1.01549	0.858981	1.02946	0.771253	1.02397	0.987711	0.95053	0.438275	0.345955	0.951647	0.93711	0.866687	1.04687	0.790444	1.07147	0.969665	0.923865	0.438322	0.30045	0.625347	0.117075	0.660627	1.01733	0.700389	0.77957	0.691031	0.521301	0.705761	0.688167	0.642033	0.171658	0.646566	0.980911	0.684807	0.800602	0.689213	0.518395	0.744353
LB xylose Mn++	0.673281	0.751202	0.508325	0.345368	0.21721	0.955186	0.365294	0.132236	0	0.017335	0.607347	0.723809	0.510334	0.403854	0.0214647	0.917859	0.0208458	0.0547605	0	0	0.618644	0.65759	0.554958	0.361614	0.239143	0.952103	0.0956814	0.0251697	0	0	0	0	0	0.932169	0.430039	0.260229	0.246225	0	0.193204	0.108506	0	0	0.190528	0.91268	0.414738	0.24811	0.0363578	0	0.239437
LB D-glu	1.01308	0.954753	0.846363	0.933819	0.773354	1.01	0.973357	0.965976	0.53762	0.438233	0.866796	0.947637	0.856342	0.988612	0.730042	0.992728	0.987669	0.936373	0.45123	0.332651	0.901395	0.905121	0.865373	0.996872	0.774858	1.02812	0.953553	0.926773	0.453717	0.322264	0.532462	0.261971	0.6313	0.893944	0.723043	0.85469	0.759233	0.461683	0.767724	0.626023	0.508966	0.304887	0.591213	0.861735	0.721211	0.889643	0.795635	0.447504	0.794252
LB xylose D-glu	0.811757	0.618446	0.458161	0.495227	0.241367	0.935071	0.534109	0.425208	0.00598643	0	0.702303	0.57235	0.442541	0.508585	0.00356218	0.893671	0.326568	0.328219	0	0	0.72086	0.519243	0.485845	0.494855	0.22407	0.915949	0.344278	0.291875	0	0	0	0	0.00440343	0.686398	0.329033	0.23834	0.296949	0	0.147898	0	0	0	0.108977	0.655641	0.312346	0.218093	0.167948	0	0.177734
MSgg gln	0.49079	0.764058	0.872905	0.914732	0.522309	1.12577	0.814411	1.03162	0.305991	0.210735	0.368148	0.730361	0.890618	0.98122	0.431661	1.10886	0.760865	1.01581	0.13723	0.00669733	0.405188	0.656907	0.936867	1.01055	0.53871	1.16109	0.766504	1.01526	0.233089	0.0972317	0.742178	0.350647	0.868399	1.19117	0.99802	1.09795	0.922334	0.862134	0.889566	0.889789	0.739988	0.470485	0.865382	1.14374	1.01144	1.13067	0.947386	0.828649	0.931581
MSgg xylose gln	0	0	0.0458056	0.0775144	0.247725	0.690606	0.415841	0.272584	0.12714	0.142496	0	0	0	0.0538288	0	0.520376	0	0	0	0	0	0	0.0803701	0	0.173952	0.577956	0.0555081	0.0343169	0	0	0	0.0467205	0	1.03163	0.724296	0.723559	0.508699	0.625856	0.509582	0.787963	0	0.170254	0.199401	1.01864	0.74085	0.757036	0.476772	0.621234	0.533626
LB ser	0.901804	0.859647	0.739749	0.813586	0.604108	0.925281	0.854666	0.875343	0.386278	0.290684	0.756963	0.846957	0.770167	0.885232	0.596511	0.901208	0.898238	0.890902	0.33037	0.206257	0.812228	0.767586	0.793372	0.878929	0.644306	0.949644	0.862639	0.878554	0.330598	0.220936	0.398639	0.162753	0.472835	0.771236	0.535627	0.742604	0.546654	0.329792	0.655573	0.465339	0.387092	0.19285	0.457549	0.751707	0.515948	0.774623	0.481978	0.298163	0.64289
LB xylose ser	0.710977	0.541233	0.452379	0.442855	0.221925	0.864519	0.489245	0.437373	0.0234134	0	0.618519	0.502984	0.44231	0.461975	0.064007	0.835851	0.329796	0.370894	0	0	0.633407	0.458829	0.464308	0.443131	0.227616	0.857535	0.347762	0.343813	0.0197137	0	0.0517597	0.00039239	0.0712885	0.608772	0.307059	0.355785	0.26389	0.0195635	0.19105	0.0892141	0.023242	0	0.119324	0.567737	0.284412	0.345634	0.0904775	0	0.220545
MSgg ser	0.464403	0.750466	0.88317	0.87998	0.415052	1.06678	0.78885	0.959007	0.190383	0.105367	0.370142	0.72117	0.92346	0.93417	0.300363	1.05087	0.748387	0.962028	0.0304986	0	0.387412	0.65665	0.933617	0.932295	0.418965	1.09038	0.740883	0.946531	0.152625	0.000616782	0.691534	0.28525	0.875925	1.10832	0.923276	1.0571	0.763431	0.721428	1.00853	0.935622	0.725066	0.413495	0.848798	1.04803	0.928636	1.09295	0.768048	0.705322	1.04527
MSgg xylose ser	0	0	0.063691	0.072854	0.167891	0.634535	0.318232	0.185065	0.0704571	0.0619826	0	0	0	0.0663095	0	0.470716	0	0.0209123	0	0	0	0	0.075748	0.017442	0.145448	0.513754	0.0405128	0.0322427	0	0	0	0.0902673	0	0.983691	0.58303	0.606697	0.333474	0.467954	0.646896	0.859259	0	0.200605	0.155717	0.932482	0.609065	0.655689	0.241974	0.473905	0.68459
MSgg gly	0.420113	0.848976	0.786895	0.815067	0.442416	1.02916	0.718551	0.930915	0.217187	0.13525	0.31524	0.862109	0.833245	0.890343	0.355496	0.994207	0.664054	0.90516	0.0636042	0	0.325827	0.770668	0.85633	0.908259	0.45384	1.06203	0.659512	0.91544	0.137124	0	0.656609	0.275883	0.815111	1.09786	0.934623	1.01209	0.809068	0.740855	0.839576	0.823927	0.661064	0.386048	0.798462	1.03804	0.937667	1.07453	0.835568	0.710342	0.880876
MSgg xylose gly	0	0.291651	0.0550742	0.050094	0.157466	0.551397	0.274326	0.126452	0.0290773	0.0313458	0	0.255809	0	0.0572675	0	0.421176	0	0	0	0	0	0.237362	0.0461022	0	0.123396	0.448216	0.0213063	0.00122493	0	0	0	0.0249324	0	0.940861	0.594664	0.577528	0.399311	0.415846	0.388611	0.725233	0	0.104141	0.106767	0.927621	0.616873	0.633694	0.399342	0.420896	0.42596
MSgg trp	0.380805	0.652419	0.798049	0.835806	0.37987	1.01377	0.643878	0.981005	0.132396	0.0904835	0.321586	0.60448	0.795577	0.849247	0.267927	0.987506	0.555911	0.894387	0.0457541	0	0.357128	0.534213	0.807527	0.853831	0.401782	1.04418	0.556593	0.947794	0.154639	0.0483604	0.585213	0.231089	0.762456	1.16561	0.976859	0.999174	0.760268	0.689642	0.685468	0.806534	0.583204	0.405893	0.768858	1.23186	1.0306	1.02279	0.782222	0.696446	0.813728
MSgg xylose trp	0	0.0178916	0.104654	0.130472	0.303232	1.0415	0.446452	0.22957	0.129402	0.127103	0	0	0	0.0652304	0.0316877	0.956273	0.062892	0.01094	0	0	0	0	0.0572807	0.0147338	0.237574	0.994127	0.120449	0.0387466	0.0119536	0	0	0.107635	0.0235902	0.999423	0.718803	0.782266	0.403758	0.562985	0.51269	0.800843	0	0.247451	0.265043	1.00411	0.742389	0.804248	0.355786	0.572317	0.555367
MSgg cys	0.406877	0.654967	0.789958	0.796264	0.388203	1.02993	0.687804	1.00216	0.108435	0.060467	0.35477	0.632116	0.793526	0.839054	0.277561	1.01039	0.593627	0.944312	0.0122694	0	0.415244	0.554834	0.828137	0.854463	0.441208	1.05446	0.574722	0.953733	0.15402	0	0.648486	0.353924	0.739083	1.15739	1.02083	1.02171	0.859644	0.745823	0.6908	0.82823	0.644193	0.408342	0.758878	1.18806	1.03971	1.03213	0.912122	0.753085	0.842093
MSgg xylose cys	0	0	0.0686483	0.0851679	0.206217	0.566944	0.327626	0.173205	0.0344796	0.0404271	0	0	0.0136857	0.12561	0	0.477552	0.00599298	0.0549865	0	0	0	0	0.108398	0.0708001	0.215001	0.515938	0.114377	0.0851893	0.025385	0	0	0.114052	0.018812	0.975775	0.703548	0.760539	0.571949	0.661352	0.521677	0.784535	0	0.221647	0.213862	0.971904	0.711686	0.807792	0.559121	0.650613	0.577101
note: all amino acides are L-form unless otherwise noted
[truncated: 25 more columns]
